# Supplementary material for: Comparison of machine learning clustering algorithms for detecting heterogeneity of treatment effect in acute respiratory distress syndrome: A secondary analysis of three randomised controlled trials
Source: PubMed Central journal article supplement (PMC8645454; doi:10.1016/j.ebiom.2021.103697), 2021-12-01
Supplement: mmc2.pdf [file mmc2.pdf]

**a**  
ALVEOLI HTE Cluster Overlap: LCA & HC

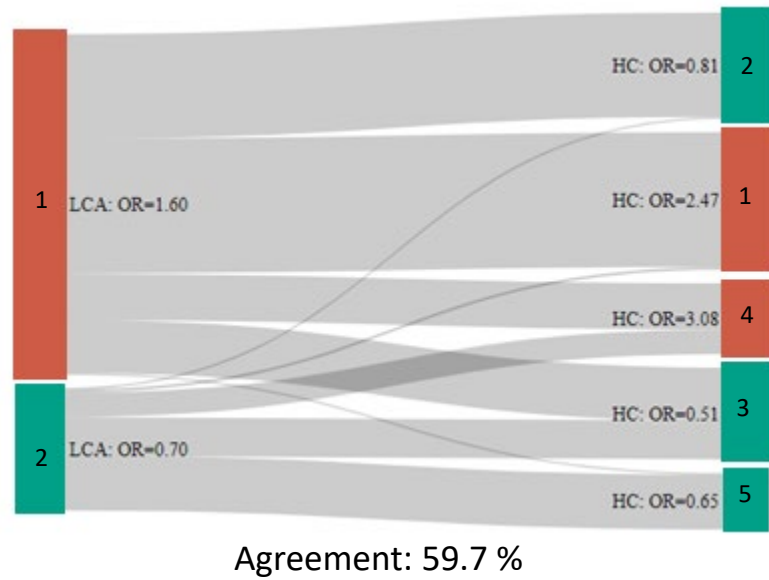

ALVEOLI HTE Cluster Overlap: LCA & XL RF

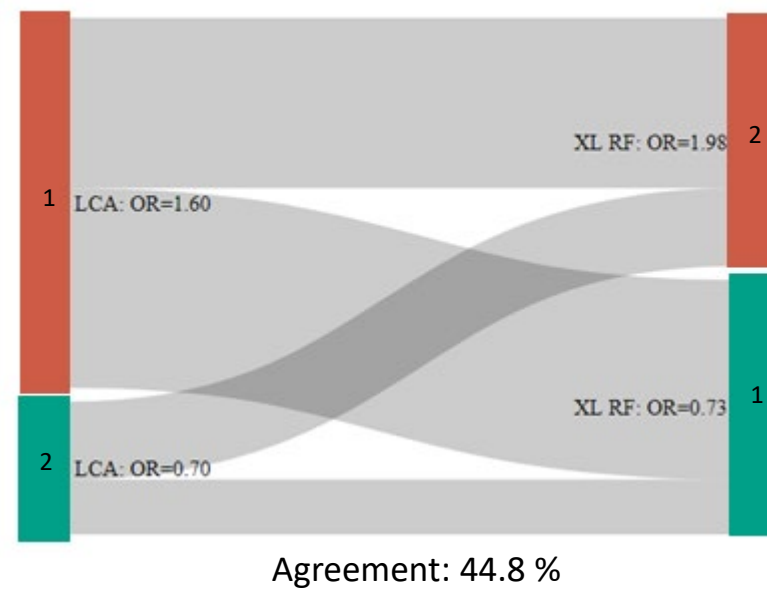

ALVEOLI HTE Cluster Overlap: XL RF & HC

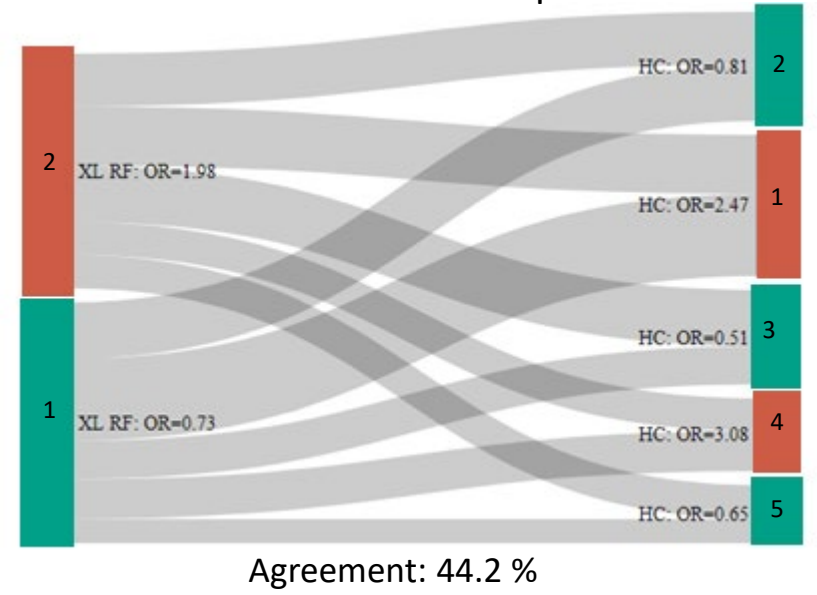

■ Harm  
■ Benefit

**b**

FACTT HTE Cluster Overlap: LCA &amp; PAM

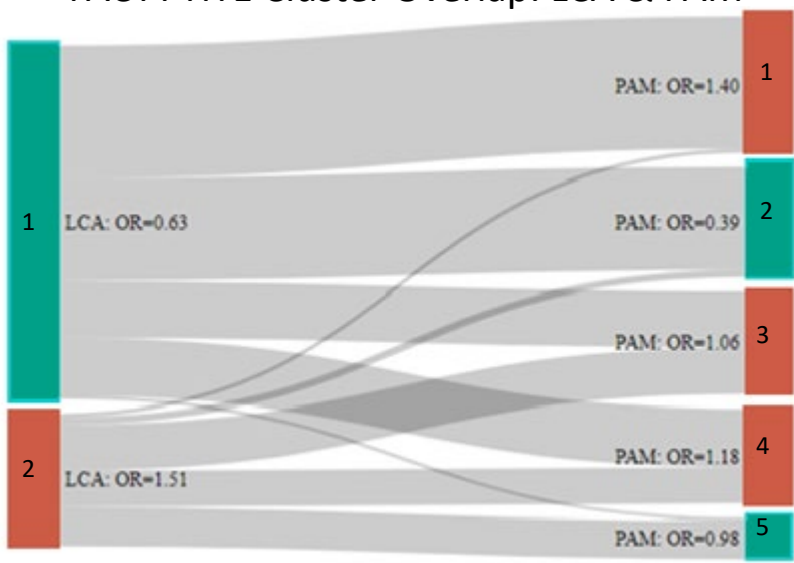

Agreement: 39.7 %

FACTT HTE Cluster Overlap: LCA &amp; CF

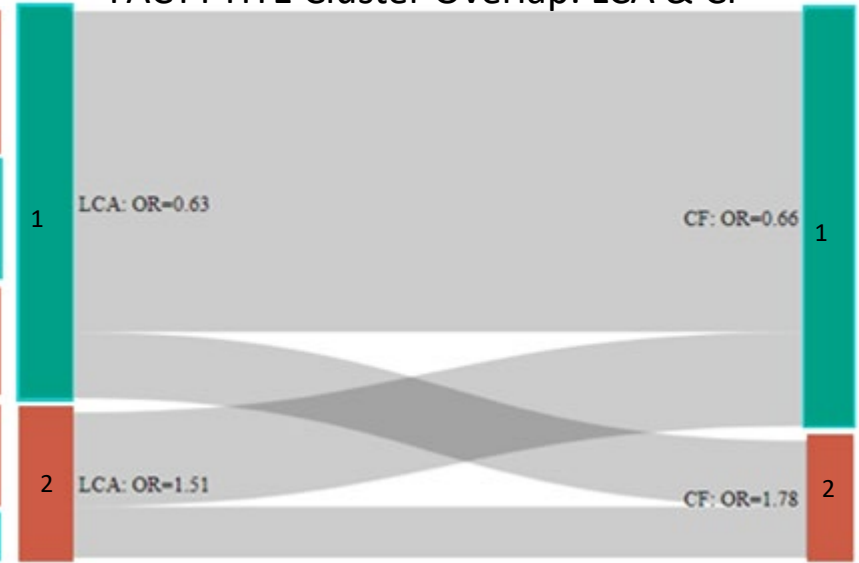

Agreement: 70.0%

FACTT HTE Cluster Overlap: LCA &amp; XL RF

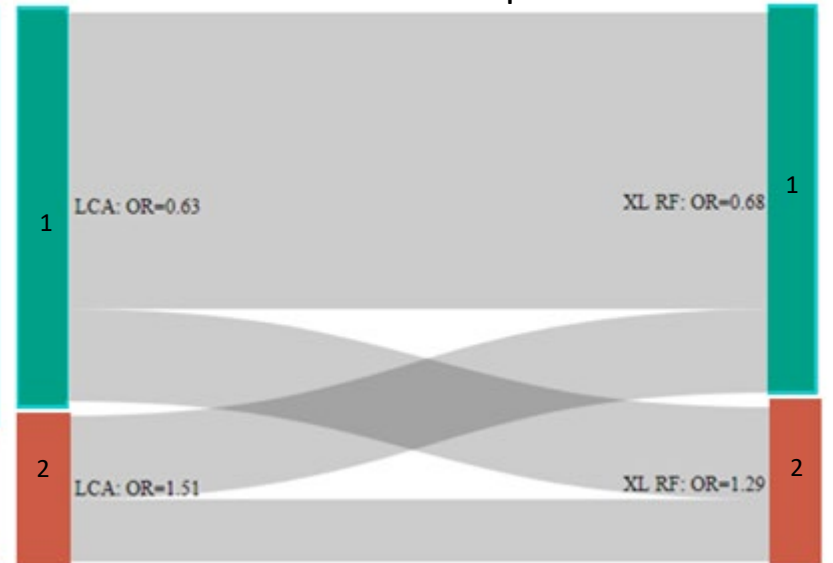

Agreement: 67.2%

FACTT HTE Cluster Overlap: LCA &amp; XL BART

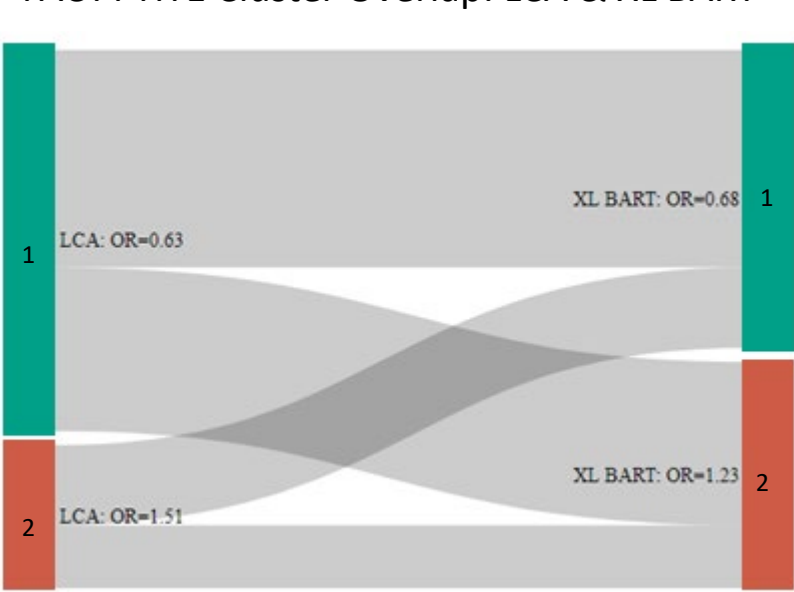

Agreement: 53.5%

FACTT HTE Cluster Overlap: CF &amp; PAM

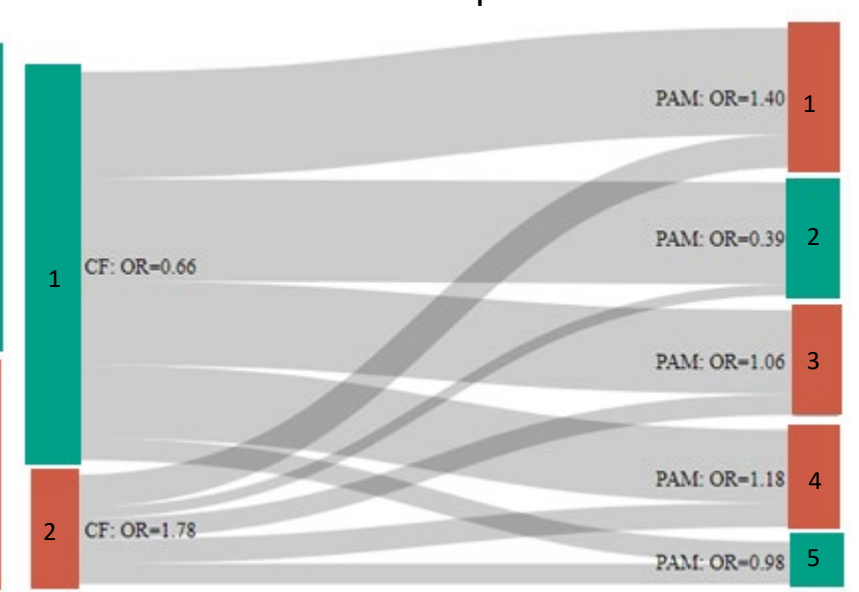

Agreement: 40.6%

FACTT HTE Cluster Overlap: XL RF &amp; PAM

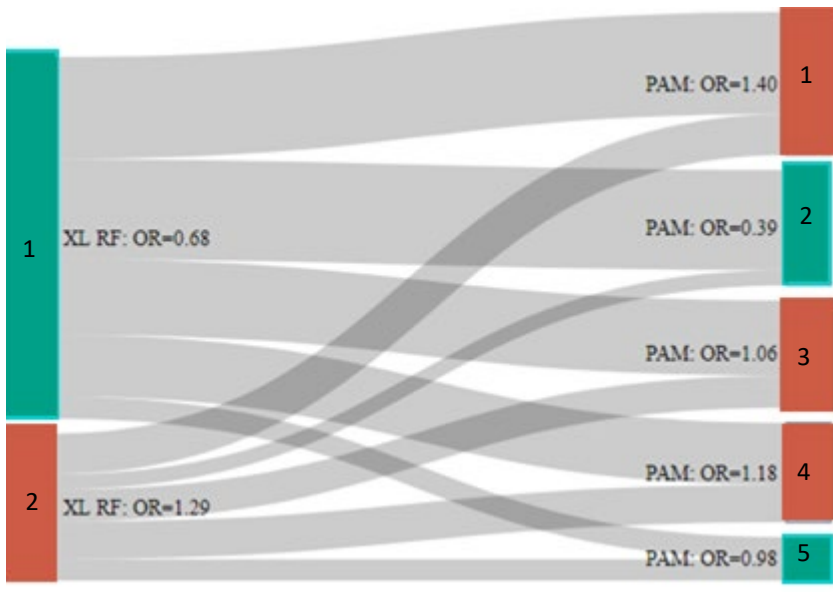

Agreement: 45.7%

**c**

FACTT HTE Cluster Overlap: XL BART &amp; PAM

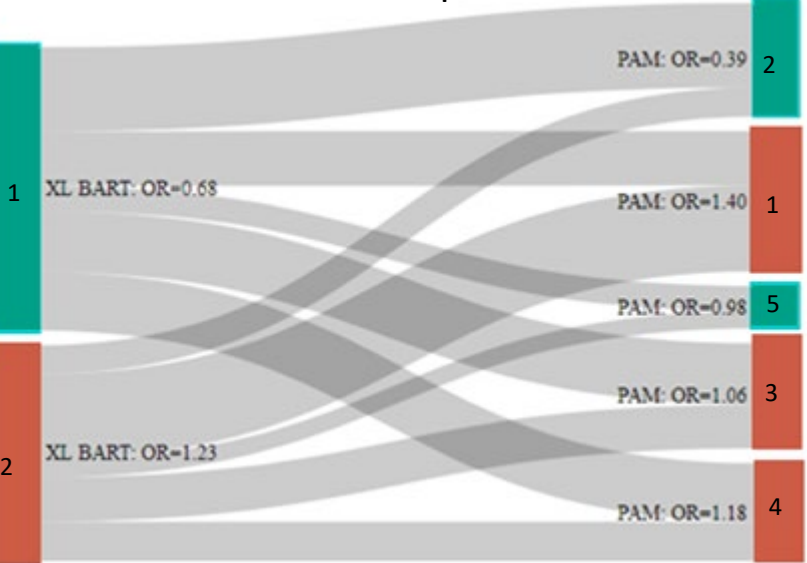

Agreement: 55.8%

FACTT HTE Cluster Overlap: CF &amp; XL RF

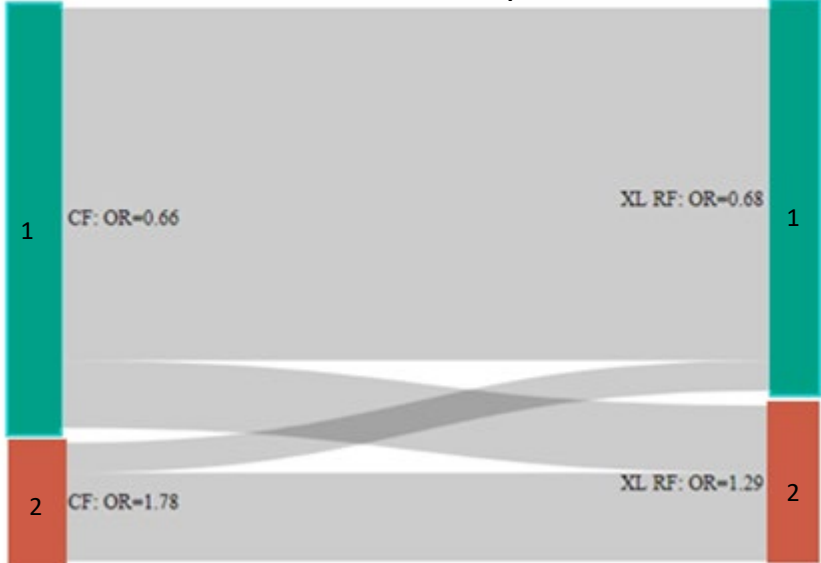

Agreement: 81.9%

FACTT HTE Cluster Overlap: CF &amp; XL BART

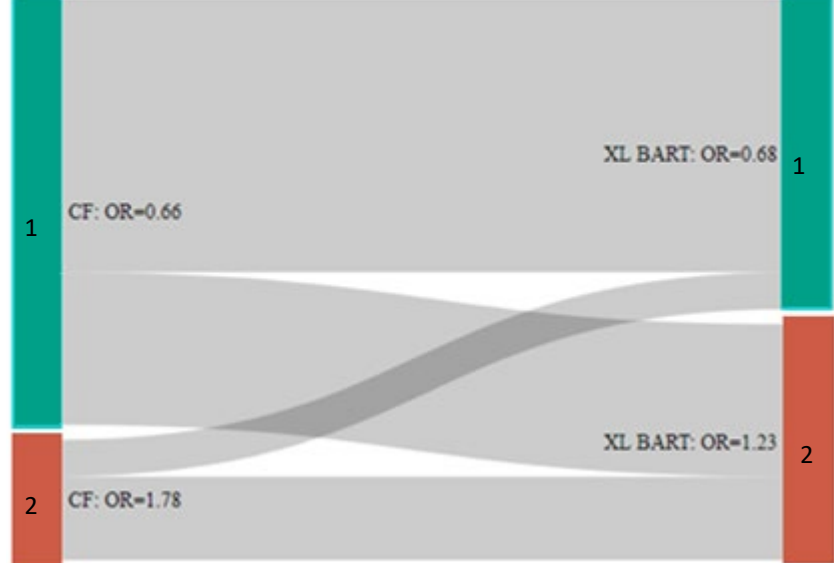

Agreement: 65.4%

FACTT HTE Cluster Overlap: XL RF &amp; XL BART

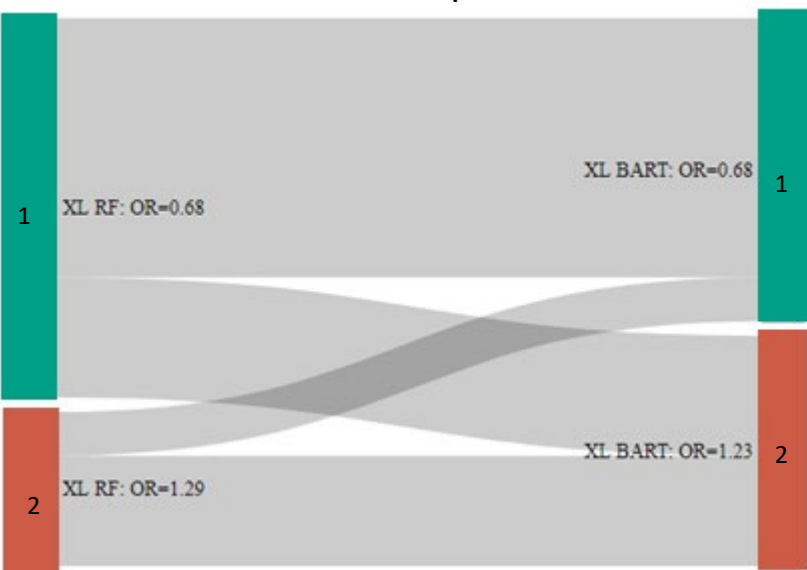

Agreement: 69.3%

FACTT HTE Cluster Overlap: LCA w/ &amp; w/o Bio

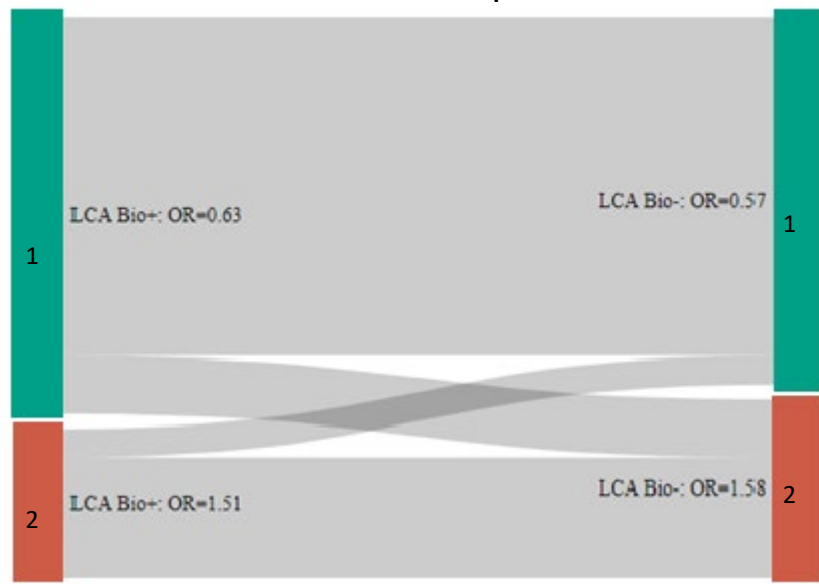

Agreement: 84.0%

**d**  
SAILS HTE Cluster Overlap: Kmeans & CF

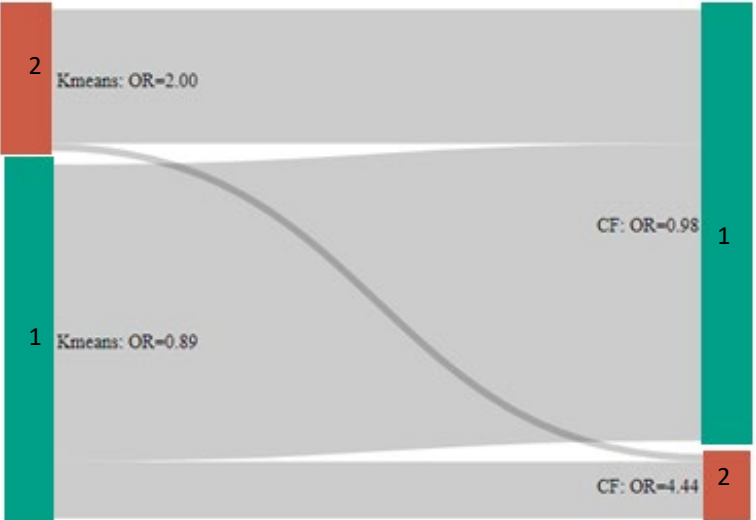

Agreement: 61.5 %
