# Supplementary material for: Comparison of machine learning clustering algorithms for detecting heterogeneity of treatment effect in acute respiratory distress syndrome: A secondary analysis of three randomised controlled trials
Source: PubMed Central journal article supplement (PMC8645454; doi:10.1016/j.ebiom.2021.103697), 2021-12-01

**a**

## Odds Ratios for Treatment Effect: Seeds in ALVEOLI

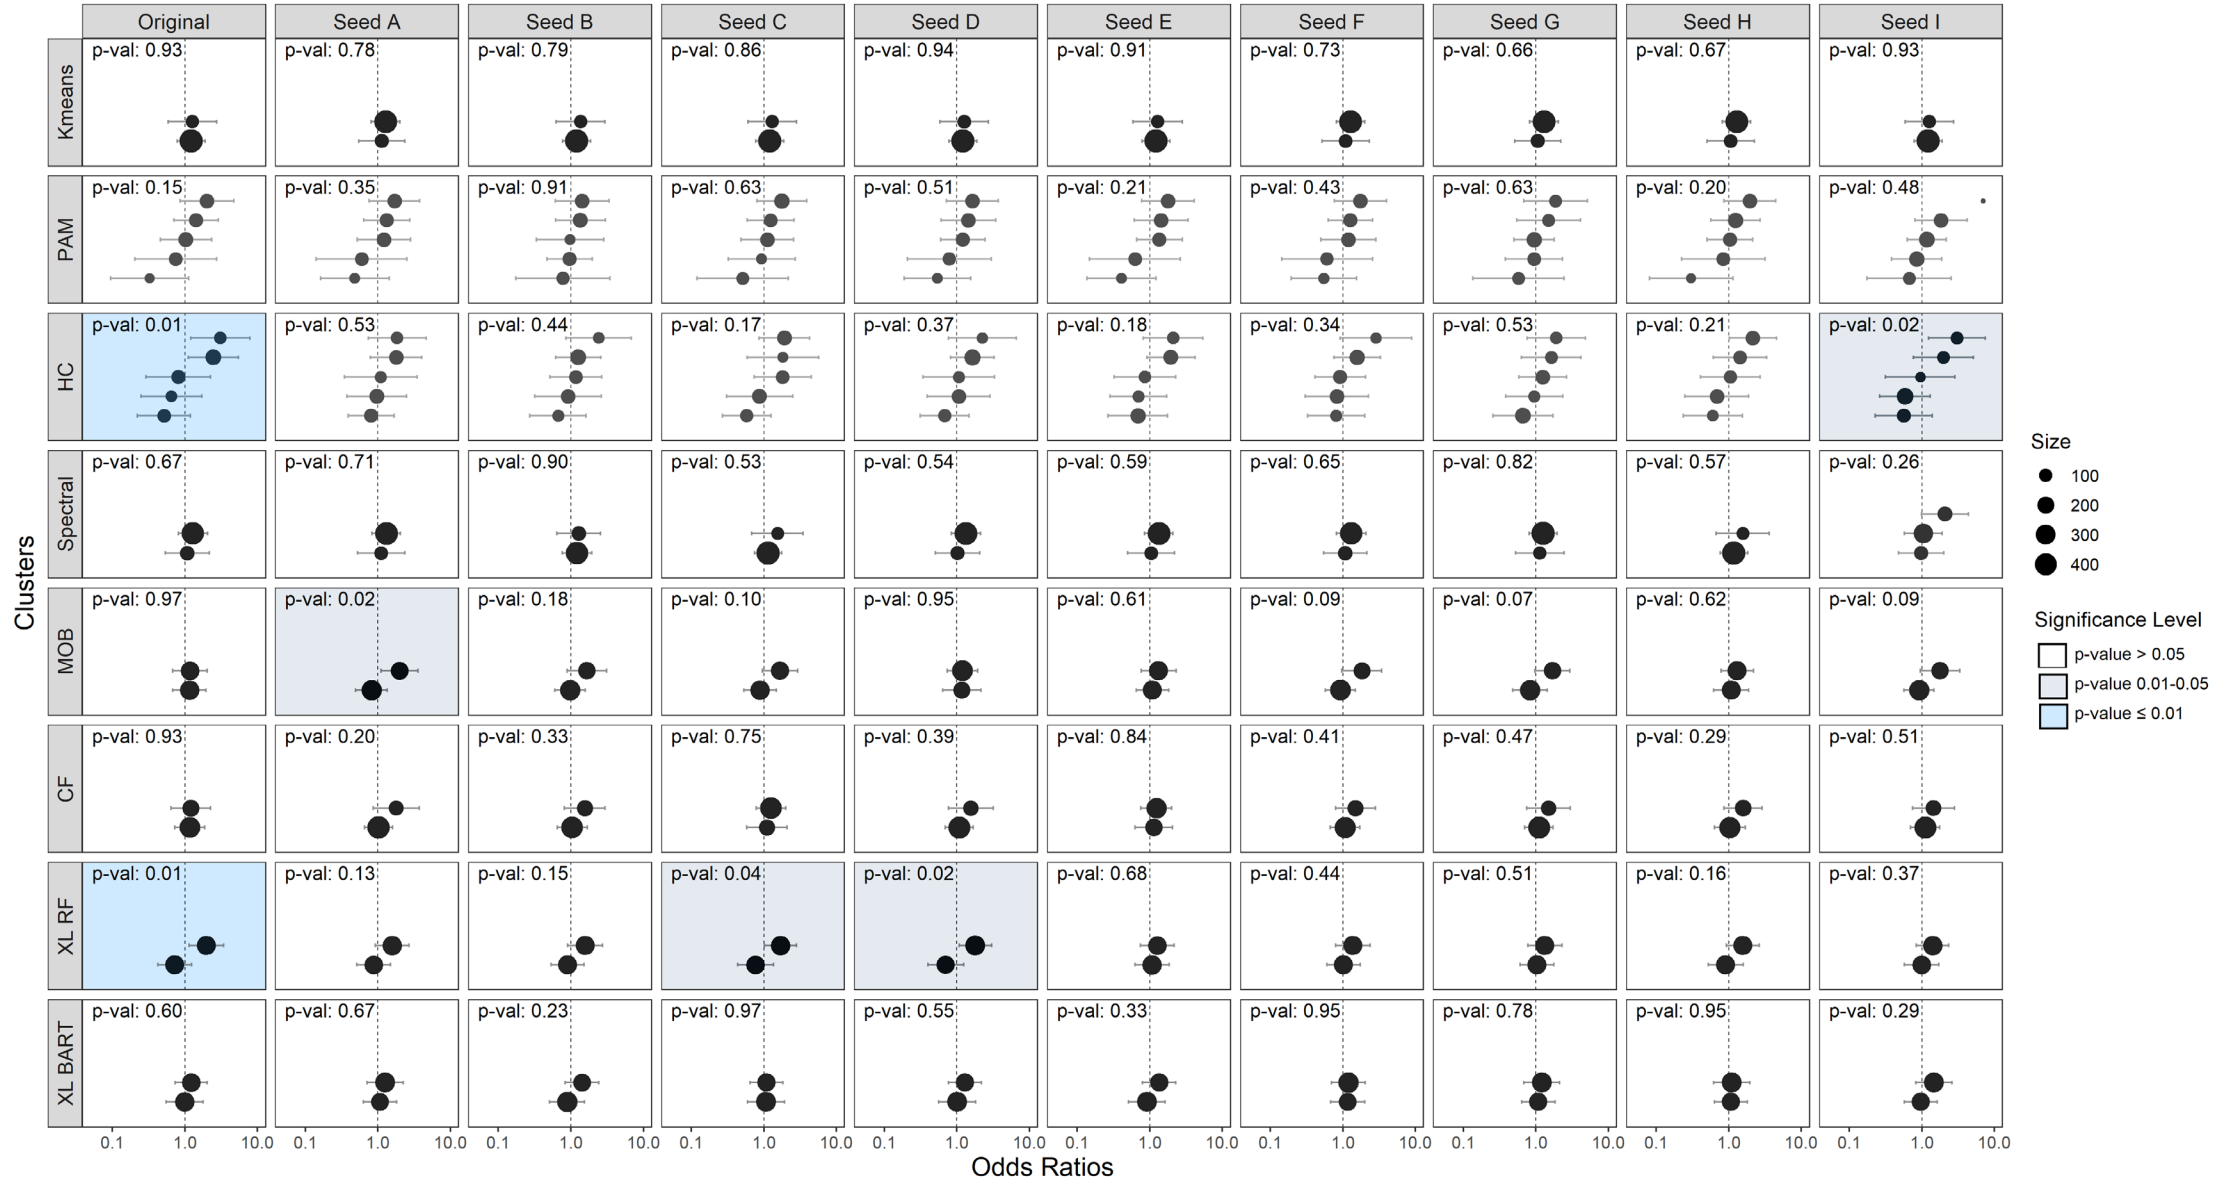

**b**

## Odds Ratios for Treatment Effect: Seeds in FACTT

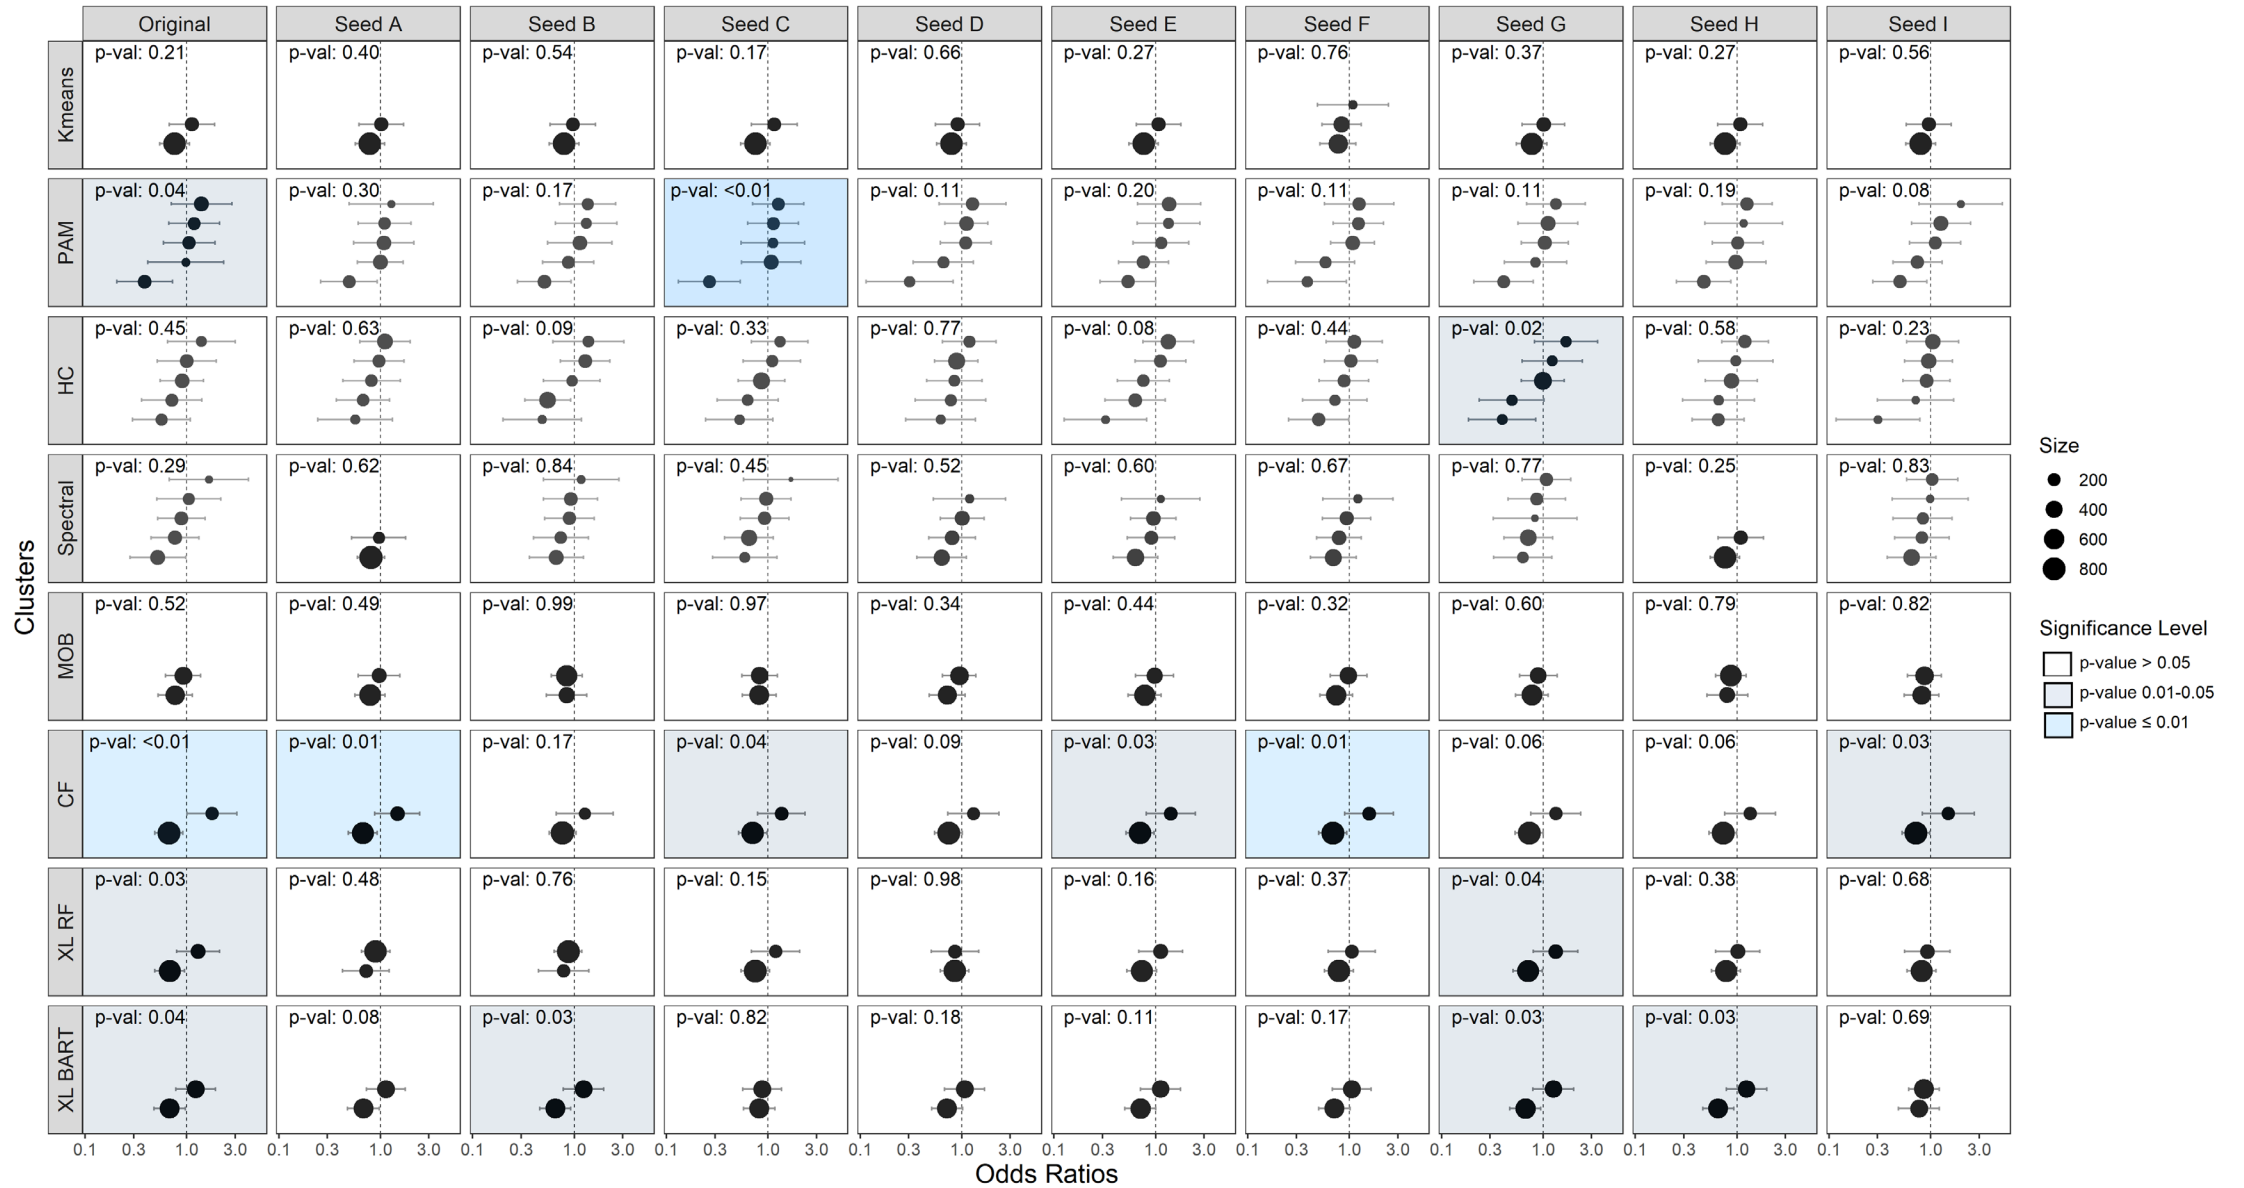

C

### Odds Ratios for Treatment Effect: Seeds in SAILS

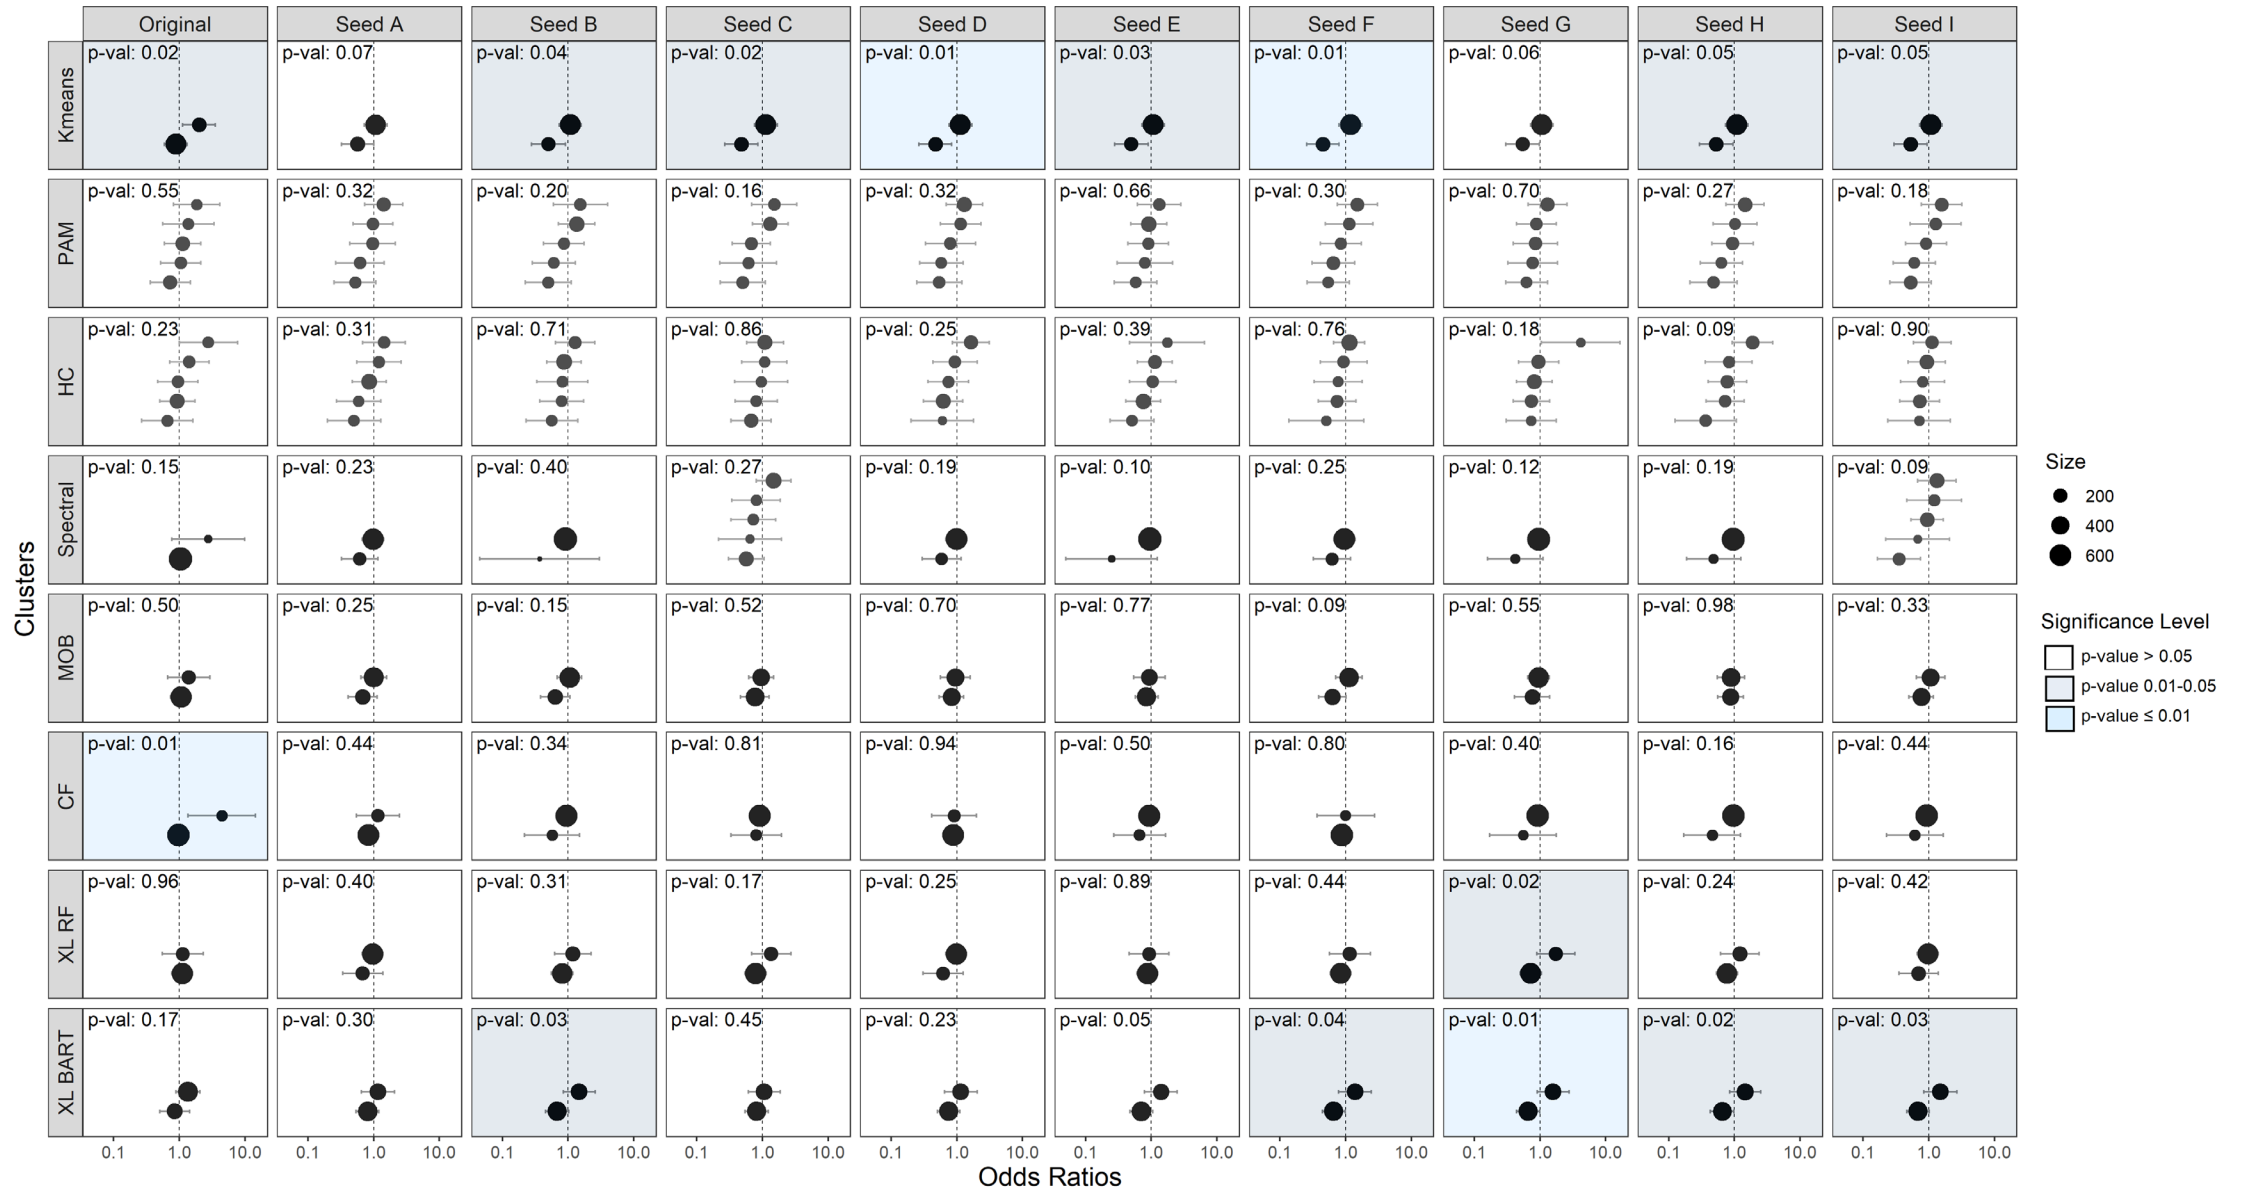

Supplement: mmc3.pdf [file mmc3.pdf]
